# Supplementary material
Source: MDPI journal article supplement (https://www.mdpi.com/2311-5637/8/12/676)
Supplement: s1 [file s1]

**Table S1.** Changes of total bacterial counts in lamb liver paste with three different treatments during storage period.

| Group | 0 d                       | 1 d                       | 7 d                       | 14 d                      | 21 d                      | 28 d                      |
|-------|---------------------------|---------------------------|---------------------------|---------------------------|---------------------------|---------------------------|
| NF    | 3.82 ± 0.53 <sup>Bb</sup> | 7.05 ± 1.08 <sup>Aa</sup> | 8.32 ± 0.8 <sup>Aa</sup>  | 8.21 ± 1.5 <sup>Aa</sup>  | 8.32 ± 0.85 <sup>Aa</sup> | 8.24 ± 0.19 <sup>Aa</sup> |
| SF    | 6.36 ± 0.55 <sup>Ba</sup> | 7.96 ± 0.6 <sup>ABa</sup> | 8.74 ± 1.78 <sup>Aa</sup> | 8.17 ± 1.04 <sup>Aa</sup> | 8.71 ± 1.15 <sup>Aa</sup> | 8.22 ± 0.25 <sup>Aa</sup> |
| ST    | 3.97 ± 0.21 <sup>Bb</sup> | 5.83 ± 0.35 <sup>Ab</sup> | 4.42 ± 0.44 <sup>Bb</sup> | 4.49 ± 0.49 <sup>Bb</sup> | 5.59 ± 0.36 <sup>Ab</sup> | 5.87 ± 0.84 <sup>Ab</sup> |

Note: Uppercase letters are significant differences in the same row, lowercase letters are significant differences in the same column and the same metric.

**Table S2.** Changes of Lactobacillus colony count in lamb liver paste with three different treatments during storage period.

| Group | 0 d                      | 1 d                       | 7 d                       | 14 d                       | 21 d                       | 28 d                       |
|-------|--------------------------|---------------------------|---------------------------|----------------------------|----------------------------|----------------------------|
| NF    | 3.4 ± 0.23 <sup>Cb</sup> | 6.92 ± 0.36 <sup>Bb</sup> | 8.88 ± 1.42 <sup>Aa</sup> | 7.38 ± 1.04 <sup>ABa</sup> | 8.01 ± 1.15 <sup>ABa</sup> | 8.34 ± 1.04 <sup>ABa</sup> |
| SF    | 5.38 ± 0.7 <sup>Ba</sup> | 7.97 ± 1.13 <sup>Aa</sup> | 8.45 ± 0.77 <sup>Aa</sup> | 7.62 ± 0.95 <sup>Aa</sup>  | 7.95 ± 0.55 <sup>Aa</sup>  | 7.96 ± 0.8 <sup>Aa</sup>   |
| ST    | 3.28 ± 0.3 <sup>Cb</sup> | 4.34 ± 0.25 <sup>Bc</sup> | 4.38 ± 0.2 <sup>Bb</sup>  | 4.18 ± 0.54 <sup>Bb</sup>  | 4.04 ± 0.24 <sup>Bb</sup>  | 5.17 ± 0.53 <sup>Ab</sup>  |

Note: Uppercase letters are significant differences in the same row, lowercase letters are significant differences in the same column and the same metric.

**Table S3.** Changes of pH value of lamb liver paste with three different treatments during storage period.

| Group | 0 d                       | 1 d                       | 7 d                       | 14 d                      | 21 d                      | 28 d                      |
|-------|---------------------------|---------------------------|---------------------------|---------------------------|---------------------------|---------------------------|
| NF    | 6.19 ± 0.52 <sup>Aa</sup> | 5.9 ± 0.44 <sup>Aa</sup>  | 4.43 ± 0.18 <sup>Bb</sup> | 4.36 ± 0.46 <sup>Bb</sup> | 4.34 ± 0.54 <sup>Bb</sup> | 4.38 ± 0.53 <sup>Bb</sup> |
| SF    | 6.2 ± 0.59 <sup>Aa</sup>  | 4.33 ± 0.42 <sup>Bb</sup> | 4.28 ± 0.05 <sup>Bb</sup> | 4.33 ± 0.29 <sup>Bb</sup> | 4.25 ± 0.49 <sup>Bb</sup> | 4.39 ± 0.73 <sup>Bb</sup> |
| ST    | 6.19 ± 0.35 <sup>Aa</sup> | 6.11 ± 0.42 <sup>Aa</sup> | 6.13 ± 0.51 <sup>Aa</sup> | 6.19 ± 0.61 <sup>Aa</sup> | 6.12 ± 0.25 <sup>Aa</sup> | 6.16 ± 0.38 <sup>Aa</sup> |

Note: Uppercase letters are significant differences in the same row, lowercase letters are significant differences in the same column and the same metric.

**Table S4.** Changes of Aw value of lamb liver paste with three different treatments during storage period.

| Group | 0 d                       | 1 d                       | 7 d                       | 14 d                      | 21 d                      | 28 d                      |
|-------|---------------------------|---------------------------|---------------------------|---------------------------|---------------------------|---------------------------|
| NF    | 0.86 ± 0.13 <sup>Aa</sup> | 0.87 ± 0.1 <sup>Aa</sup>  | 0.86 ± 0.13 <sup>Aa</sup> | 0.86 ± 0.15 <sup>Aa</sup> | 0.87 ± 0.13 <sup>Aa</sup> | 0.86 ± 0.03 <sup>Aa</sup> |
| SF    | 0.86 ± 0.07 <sup>Aa</sup> | 0.86 ± 0.08 <sup>Aa</sup> | 0.86 ± 0.19 <sup>Aa</sup> | 0.86 ± 0.08 <sup>Aa</sup> | 0.86 ± 0.08 <sup>Aa</sup> | 0.86 ± 0.05 <sup>Aa</sup> |
| ST    | 0.87 ± 0.18 <sup>Aa</sup> | 0.88 ± 0.07 <sup>Aa</sup> | 0.86 ± 0.15 <sup>Aa</sup> | 0.87 ± 0.11 <sup>Aa</sup> | 0.87 ± 0.08 <sup>Aa</sup> | 0.86 ± 0.06 <sup>Aa</sup> |

Note: Uppercase letters are significant differences in the same row, lowercase letters are significant differences in the same column and the same metric.

**Table S5.** Changes of L\* value of lamb liver paste with three different treatments during storage period.

| Group | 0 d                        | 1 d                        | 7 d                         | 14 d                       | 21 d                        | 28 d                        |
|-------|----------------------------|----------------------------|-----------------------------|----------------------------|-----------------------------|-----------------------------|
| NF    | 52.03 ± 3.04 <sup>Aa</sup> | 52.64 ± 5.97 <sup>Aa</sup> | 53.63 ± 10.23 <sup>Aa</sup> | 52.78 ± 5.34 <sup>Aa</sup> | 54.85 ± 10.62 <sup>Aa</sup> | 55.61 ± 3.99 <sup>Aab</sup> |
| SF    | 54.31 ± 4.28 <sup>Aa</sup> | 55.25 ± 3.08 <sup>Aa</sup> | 54.42 ± 2.62 <sup>Aa</sup>  | 56.2 ± 3.16 <sup>Aa</sup>  | 55.78 ± 3.74 <sup>Aa</sup>  | 58.38 ± 5.1 <sup>Aa</sup>   |
| ST    | 51.81 ± 1.6 <sup>Aa</sup>  | 48.42 ± 5.03 <sup>Aa</sup> | 51.25 ± 6.93 <sup>Aa</sup>  | 52.26 ± 2.37 <sup>Aa</sup> | 53.7 ± 3.65 <sup>Aa</sup>   | 50.43 ± 4.08 <sup>Ab</sup>  |

Note: Uppercase letters are significant differences in the same row, lowercase letters are significant differences in the same column and the same metric.

**Table S6.** Changes of a\* value of lamb liver paste with three different treatments during storage period.

| Group | 0 d                       | 1 d                       | 7 d                       | 14 d                       | 21 d                        | 28 d                       |
|-------|---------------------------|---------------------------|---------------------------|----------------------------|-----------------------------|----------------------------|
| NF    | 6.03 ± 0.24 <sup>Ba</sup> | 7.37 ± 0.4 <sup>ABb</sup> | 8.23 ± 0.75 <sup>Ab</sup> | 7.54 ± 1.44 <sup>Ab</sup>  | 7.4 ± 0.64 <sup>ABb</sup>   | 8.55 ± 1.02 <sup>Ab</sup>  |
| SF    | 6.19 ± 0.28 <sup>Ca</sup> | 9.24 ± 1.04 <sup>Ba</sup> | 10 ± 0.59 <sup>ABa</sup>  | 9.82 ± 1.07 <sup>ABa</sup> | 10.48 ± 1.23 <sup>ABa</sup> | 11.08 ± 1.03 <sup>Aa</sup> |
| ST    | 6.14 ± 0.39 <sup>Aa</sup> | 5.23 ± 0.43 <sup>Bc</sup> | 5.14 ± 0.25 <sup>Bc</sup> | 5.03 ± 0.62 <sup>Bc</sup>  | 4.96 ± 0.68 <sup>Bc</sup>   | 5.75 ± 0.55 <sup>ABc</sup> |

Note: Uppercase letters are significant differences in the same row, lowercase letters are significant differences in the same column and the same metric.

**Table S7.** Changes of b\* value of lamb liver paste with three different treatments during storage period.

| Group | 0 d                        | 1 d                        | 7 d                        | 14 d                        | 21 d                       | 28 d                       |
|-------|----------------------------|----------------------------|----------------------------|-----------------------------|----------------------------|----------------------------|
| NF    | 11.91 ± 0.85 <sup>Ab</sup> | 11.41 ± 0.66 <sup>Ab</sup> | 12.07 ± 0.83 <sup>Ab</sup> | 11.73 ± 0.96 <sup>Aab</sup> | 12.29 ± 1.14 <sup>Ab</sup> | 12.59 ± 1.46 <sup>Ab</sup> |
| SF    | 14.1 ± 0.34 <sup>Aa</sup>  | 13.05 ± 0.7 <sup>Aa</sup>  | 13.71 ± 1.55 <sup>Aa</sup> | 13.58 ± 1.5 <sup>Aa</sup>   | 14.52 ± 0.98 <sup>Aa</sup> | 14.85 ± 0.68 <sup>Aa</sup> |
| ST    | 12.11 ± 0.88 <sup>Ab</sup> | 10.83 ± 1.13 <sup>Ab</sup> | 11.27 ± 0.47 <sup>Ab</sup> | 11.15 ± 1.59 <sup>Ab</sup>  | 11.34 ± 1.04 <sup>Ab</sup> | 12.23 ± 0.7 <sup>Ab</sup>  |

Note: Uppercase letters are significant differences in the same row, lowercase letters are significant differences in the same column and the same metric.

**Table S8.** Changes of TVB-N in mutton liver paste with three different treatments during storage period.

| Group | 0 d                         | 1 d                        | 7 d                        | 14 d                       | 21 d                       | 28 d                        |
|-------|-----------------------------|----------------------------|----------------------------|----------------------------|----------------------------|-----------------------------|
| NF    | 13.25 ± 0.58 <sup>BCa</sup> | 16.19 ± 0.84 <sup>Aa</sup> | 11 ± 1.5 <sup>Ca</sup>     | 11.24 ± 2.08 <sup>Cb</sup> | 13.07 ± 0.7 <sup>Ca</sup>  | 15.37 ± 1.48 <sup>ABa</sup> |
| SF    | 13.86 ± 2.23 <sup>Aa</sup>  | 11.68 ± 0.68 <sup>Ab</sup> | 12.4 ± 1.98 <sup>Aa</sup>  | 14.68 ± 1.37 <sup>Aa</sup> | 14.56 ± 2.9 <sup>Aa</sup>  | 11.87 ± 0.54 <sup>Ab</sup>  |
| ST    | 13.23 ± 2.51 <sup>Aa</sup>  | 12.62 ± 1.97 <sup>Ab</sup> | 13.07 ± 0.67 <sup>Aa</sup> | 14.54 ± 2.61 <sup>Aa</sup> | 15.38 ± 3.24 <sup>Aa</sup> | 13.7 ± 2.25 <sup>Aab</sup>  |

Note: Uppercase letters are significant differences in the same row, lowercase letters are significant differences in the same column and the same metric.

**Table S9.** Changes of TBARS in mutton liver paste with three different treatments during storage period.

| Group | 0 d                       | 1 d                      | 7 d                       | 14 d                      | 21 d                      | 28 d                     |
|-------|---------------------------|--------------------------|---------------------------|---------------------------|---------------------------|--------------------------|
| NF    | 3.0 ± 0.05 <sup>ABa</sup> | 3.6 ± 0.04 <sup>Aa</sup> | 2.9 ± 0.01 <sup>Ba</sup>  | 2.0 ± 0.04 <sup>Ca</sup>  | 2.1 ± 0.05 <sup>Ca</sup>  | 1.9 ± 0.02 <sup>Ca</sup> |
| SF    | 3.8 ± 0.04 <sup>Aa</sup>  | 2.9 ± 0.05 <sup>Bb</sup> | 2.6 ± 0.04 <sup>BCa</sup> | 2.6 ± 0.08 <sup>BCa</sup> | 2.0 ± 0.02 <sup>CDa</sup> | 1.7 ± 0.01 <sup>Da</sup> |
| ST    | 3.7 ± 0.08 <sup>Aa</sup>  | 3.0 ± 0.02 <sup>Bb</sup> | 2.6 ± 0.01 <sup>Ba</sup>  | 2.6 ± 0.02 <sup>Ba</sup>  | 1.9 ± 0.02 <sup>Ca</sup>  | 1.7 ± 0.01 <sup>Ca</sup> |

Note: Uppercase letters are significant differences in the same row, lowercase letters are significant differences in the same column and the same metric.

**Table S10.** Changes of moisture content in lamb liver paste with three different treatments during storage period.

| Group | 0 d                        | 1 d                        | 7 d                        | 14 d                       | 21 d                       | 28 d                       |
|-------|----------------------------|----------------------------|----------------------------|----------------------------|----------------------------|----------------------------|
| NF    | 40.76 ± 1.67 <sup>Aa</sup> | 39.59 ± 6.32 <sup>Aa</sup> | 39.34 ± 5.71 <sup>Aa</sup> | 40.19 ± 2.86 <sup>Aa</sup> | 39.46 ± 5.59 <sup>Aa</sup> | 39.73 ± 3.22 <sup>Aa</sup> |
| SF    | 39.19 ± 2.13 <sup>Aa</sup> | 39.18 ± 5.77 <sup>Aa</sup> | 39.52 ± 6.1 <sup>Aa</sup>  | 39.65 ± 2.49 <sup>Aa</sup> | 39.94 ± 5.93 <sup>Aa</sup> | 38.79 ± 2.39 <sup>Aa</sup> |
| ST    | 39.87 ± 2.58 <sup>Aa</sup> | 38.9 ± 4.51 <sup>Aa</sup>  | 39.07 ± 3.53 <sup>Aa</sup> | 39.62 ± 5.47 <sup>Aa</sup> | 39.13 ± 3.82 <sup>Aa</sup> | 38.59 ± 2.68 <sup>Aa</sup> |

Note: Uppercase letters are significant differences in the same row, lowercase letters are significant differences in the same column and the same metric.

**Table S11.** Changes of protein content in lamb liver paste with three different treatments during storage period.

| Group | 0 d                        | 1 d                         | 7 d                        | 14 d                       | 21 d                       | 28 d                        |
|-------|----------------------------|-----------------------------|----------------------------|----------------------------|----------------------------|-----------------------------|
| NF    | 11.66 ± 0.54 <sup>Aa</sup> | 11.42 ± 1.34 <sup>Aa</sup>  | 12.32 ± 1.74 <sup>Aa</sup> | 12.81 ± 0.93 <sup>Aa</sup> | 11.85 ± 1.75 <sup>Aa</sup> | 12.59 ± 1.72 <sup>Aa</sup>  |
| SF    | 11.32 ± 0.68 <sup>Aa</sup> | 11.11 ± 1.27 <sup>Aa</sup>  | 11.4 ± 1.65 <sup>Aab</sup> | 10.94 ± 1.38 <sup>Ab</sup> | 10.99 ± 0.74 <sup>Aa</sup> | 11.47 ± 1.16 <sup>Aab</sup> |
| ST    | 11.75 ± 1.28 <sup>Aa</sup> | 10.18 ± 1.58 <sup>ABa</sup> | 9.72 ± 1.02 <sup>ABb</sup> | 9.32 ± 1.33 <sup>Bb</sup>  | 9.72 ± 1.83 <sup>ABa</sup> | 10.14 ± 0.71 <sup>ABb</sup> |

Note: Uppercase letters are significant differences in the same row, lowercase letters are significant differences in the same column and the same metric.

**Table S12.** Changes of crude fat content in lamb liver paste with three different treatments during storage period.

| Group | 0 d                       | 1 d                       | 7 d                        | 14 d                      | 21 d                       | 28 d                      |
|-------|---------------------------|---------------------------|----------------------------|---------------------------|----------------------------|---------------------------|
| NF    | 3.04 ± 0.64 <sup>Bb</sup> | 4.35 ± 0.39 <sup>Ab</sup> | 3.78 ± 0.23 <sup>ABb</sup> | 4.19 ± 0.09 <sup>Ab</sup> | 3.91 ± 0.49 <sup>Ab</sup>  | 4.15 ± 0.61 <sup>Ac</sup> |
| SF    | 3.77 ± 0.42 <sup>Ca</sup> | 4.04 ± 0.69 <sup>Cb</sup> | 4.59 ± 0.56 <sup>BCb</sup> | 4.6 ± 0.09 <sup>BCb</sup> | 5.36 ± 0.57 <sup>ABa</sup> | 5.71 ± 0.51 <sup>Ab</sup> |
| ST    | 3.07 ± 0.11 <sup>Bb</sup> | 5.75 ± 0.34 <sup>Aa</sup> | 6.6 ± 1.36 <sup>Aa</sup>   | 6.02 ± 0.97 <sup>Aa</sup> | 5.5 ± 0.39 <sup>Aa</sup>   | 6.78 ± 0.65 <sup>Aa</sup> |

Note: Uppercase letters are significant differences in the same row, lowercase letters are significant differences in the same column and the same metric.
